# Supplementary material for: Internet-based cognitive–behavioural therapy for insomnia (ICBT-i): a meta-analysis of randomised controlled trials
Source: PubMed Central journal article supplement — BMJ Open. 2016 Nov 30;6(11):e010707. doi: 10.1136/bmjopen-2015-010707 (PMC5168528; doi:10.1136/bmjopen-2015-010707), 2016-11-30
Supplement: bmjopen-2015-010707supp1.pdf [file bmjopen-2015-010707supp1.pdf]

## Search strategy

### PubMed:

A combination of keywords were used as follows:

(internet OR website OR web OR online OR computer OR self-help OR self-administer OR self-care OR self-instruct OR self-management) [All Fields]AND (cognitive therapy, behavioral therapy OR cognitive behavioral therapy OR CBT) [All Fields] AND (sleep problem OR sleep disorder OR insomnia) [All Fields] AND (randomized controlled trial OR RCT) [All Fields].
