# Supplementary material for: Internet-based cognitive–behavioural therapy for insomnia (ICBT-i): a meta-analysis of randomised controlled trials
Source: PubMed Central journal article supplement — BMJ Open. 2016 Nov 30;6(11):e010707. doi: 10.1136/bmjopen-2015-010707 (PMC5168528; doi:10.1136/bmjopen-2015-010707), 2016-11-30
Supplement: bmjopen-2015-010707supp2.pdf [file bmjopen-2015-010707supp2.pdf]

## Risk-of-Bias Assessments

|                   | Sequence<br>Generation | Allocation<br>Concealment | Blinding of<br>Participants<br>and Personnel | Blinding of<br>Outcome<br>Assessment | Incomplete<br>Outcome Data | Selective<br>Outcome<br>Reporting | Other<br>Issues |
|-------------------|------------------------|---------------------------|----------------------------------------------|--------------------------------------|----------------------------|-----------------------------------|-----------------|
| Ström, 2004       | Unclear                | Unclear                   | Unclear                                      | Unclear                              | Low                        | Low                               | Low             |
| Ritterband, 2009  | Low                    | Unclear                   | High                                         | Unclear                              | Low                        | Low                               | Low             |
| Vincent, 2009     | Low                    | Unclear                   | High                                         | Unclear                              | Low                        | Low                               | Low             |
| Espie, 2012       | Low                    | Low                       | High                                         | Unclear                              | Low                        | Low                               | High            |
| Lancee, 2012      | Low                    | Unclear                   | High                                         | Unclear                              | Low                        | Low                               | Low             |
| Ritterband, 2012  | Low                    | Unclear                   | Unclear                                      | Unclear                              | Low                        | Low                               | Low             |
| Lancee, 2013      | Low                    | Unclear                   | High                                         | Unclear                              | Low                        | Low                               | Low             |
| Ho, 2014          | Low                    | Unclear                   | High                                         | Low                                  | Low                        | Low                               | Low             |
| Holmqvist, 2014   | Low                    | Low                       | High                                         | Unclear                              | Low                        | Low                               | Low             |
| van Straten, 2014 | Low                    | Low                       | Unclear                                      | Unclear                              | High                       | Low                               | Low             |
| Blom(a), 2015     | Low                    | Low                       | High                                         | Unclear                              | High                       | Low                               | Low             |
| Blom(b), 2015     | Low                    | Low                       | High                                         | Unclear                              | High                       | Low                               | Low             |
| Lancee, 2015      | Unclear                | Unclear                   | High                                         | Unclear                              | Low                        | Low                               | Low             |
| Kaldo ,2015       | Low                    | Low                       | High                                         | Unclear                              | High                       | Low                               | Low             |
